# Supplementary material
Source: PubMed Central journal article supplement (PMC11085045)

Suppl. Table 1. List of antibodies

| Antibody                                         | Isotype        | Host    | Company       | Catalog number | Dilutions          | RRID #                      |
|--------------------------------------------------|----------------|---------|---------------|----------------|--------------------|-----------------------------|
| <b>Primary antibodies</b>                        |                |         |               |                |                    |                             |
| Endothelin B receptor                            | IgG            | Rabbit  | Alomone       | AER-002        | 1:500, 1:200, 1:50 | <a href="#">AB_203984</a>   |
| Endothelin B receptor                            | IgG            | Rabbit  | Abcam         | ab117529       | 1:500, 1:200, 1:50 | <a href="#">AB_1090207</a>  |
| Endothelin B receptor                            | IgG            | Rabbit  | GeneTex       | GTX17408       | 1:500, 1:200, 1:50 | <a href="#">AB_374462</a>   |
| Rabbit Isotype control                           | IgG            | Rabbit  | Invitrogen    | 31235          | 1:200              | <a href="#">AB_243593</a>   |
| Chicken Isotype control                          | IgY            | Chicken | Abcam         | ab50579        | 1:200              | not available               |
| Anti-GFP                                         | IgY            | Chicken | Abcam         | ab13970        | 1:200              | <a href="#">AB_300798</a>   |
| Smooth muscle actin,<br>Clone EPR5368            | IgG            | Rabbit  | Abcam         | ab124964       | 1:50               | <a href="#">AB_11129103</a> |
| Endothelin 1                                     | IgG            | Rabbit  | Abcam         | ab113697       | 1:200              | not available               |
| HuC/HuD, Clone EPR19098                          | IgG            | Rabbit  | Abcam         | ab184267       | 1:200              | <a href="#">AB_2864321</a>  |
| S100 beta, Clone 4C4.9                           | IgG2a          | Mouse   | Abcam         | ab4066         | 1:200              | <a href="#">AB_304258</a>   |
| S100 beta, Clone EP1576Y                         | IgG            | Rabbit  | Abcam         | ab52642        | 1:200              | <a href="#">AB_882426</a>   |
| MHCII                                            | IgG2b $\kappa$ | Mouse   | Novus         | NBP2-45312     | 1:200              | not available               |
| MPO                                              | IgG            | Rabbit  | Abcam         | ab9535         | 1:100              | <a href="#">AB_307322</a>   |
| CD68, Clone FA-11                                | IgG2a          | Rat     | Bio-Rad       | MCA1957T       | 1:200              | <a href="#">AB_322219</a>   |
| Peripherin                                       | IgY            | Chicken | Novus         | NBP1-05423     | 1:200              | <a href="#">AB_1556333</a>  |
| GFAP                                             | IgY            | Chicken | Abcam         | ab4674         | 1:200              | <a href="#">AB_304558</a>   |
| Chromogranin A                                   | IgG            | Rabbit  | Abcam         | ab15160        | 1:200              | <a href="#">AB_301704</a>   |
| <b>Secondary antibodies</b>                      |                |         |               |                |                    |                             |
| anti-rabbit, Alexa 488                           | IgG            | Donkey  | Invitrogen    | A21206         | 1:400              | <a href="#">AB_2535792</a>  |
| anti-mouse, Alexa 488                            | IgG            | Donkey  | Invitrogen    | A21202         | 1:400              | <a href="#">AB_141607</a>   |
| anti-mouse, Alexa 568                            | IgG            | Donkey  | Invitrogen    | A10037         | 1:400              | <a href="#">AB_2534013</a>  |
| anti-rat, Alexa 488                              | IgG            | Donkey  | Invitrogen    | A21208         | 1:400              | <a href="#">AB_2535794</a>  |
| anti-chicken, Alexa 568                          | IgY            | Goat    | Invitrogen    | A11041         | 1:400              | <a href="#">AB_2534098</a>  |
| anti-rabbit, Cy5                                 | IgG            | Goat    | Invitrogen    | A10523         | 1:400              | <a href="#">AB_2534032</a>  |
| anti-mouse, IRDye 680RD                          |                | Donkey  | Li-Cor        | 926-68072      | 1:5000             | <a href="#">AB_10953628</a> |
| anti-rabbit, IRDye 800CW                         |                | donkey  | Li-Cor        | 926-32212      | 1:5000             | <a href="#">AB_621847</a>   |
| anti-goat, IRDye 680RD                           |                | donkey  | Li-Cor        | 926-68074      | 1:5000             | <a href="#">AB_10956736</a> |
| anti-chicken, IRDye 680RD                        |                | donkey  | Li-Cor        | 926-68075      | 1:5000             | <a href="#">AB_10974977</a> |
| NucBlue Fixed Cell Ready<br>Probe Reagent (DAPI) |                |         | Thermo Fisher | R37606         | 2drops/1 ml        | not available               |

## Suppl. Table 2. Taqman PCR Assays

| <b>ASSAY name</b>                         | <b>Assay ID</b> | <b>Ref Seq Link</b>                                                                                                   |
|-------------------------------------------|-----------------|-----------------------------------------------------------------------------------------------------------------------|
| <b>ednra</b>                              | Mm01243719_m1   | <a href="https://www.ncbi.nlm.nih.gov/nuccore/NM_010332.2">https://www.ncbi.nlm.nih.gov/nuccore/NM_010332.2</a>       |
| <b>ednrb (Endothelin receptor type B)</b> | Mm00432989_m1   | <a href="https://www.ncbi.nlm.nih.gov/nuccore/NM_001136061.2">https://www.ncbi.nlm.nih.gov/nuccore/NM_001136061.2</a> |
| <b>endothelin 1 (ET1)</b>                 | Mm00438656_m1   | <a href="https://www.ncbi.nlm.nih.gov/nuccore/NM_010104.3">https://www.ncbi.nlm.nih.gov/nuccore/NM_010104.3</a>       |
| <b>endothelin 2 (ET2)</b>                 | Mm00432983_m1   | <a href="https://www.ncbi.nlm.nih.gov/nuccore/NM_007902.2">https://www.ncbi.nlm.nih.gov/nuccore/NM_007902.2</a>       |
| <b>endothelin 3 (ET3)</b>                 | Mm00432987_m1   | <a href="https://www.ncbi.nlm.nih.gov/nuccore/NM_007903.4">https://www.ncbi.nlm.nih.gov/nuccore/NM_007903.4</a>       |
| <b>nestin</b>                             | Mm00450205_m1   | <a href="https://www.ncbi.nlm.nih.gov/nuccore/NM_016701.3">https://www.ncbi.nlm.nih.gov/nuccore/NM_016701.3</a>       |
| <b>GFAP</b>                               | Mm01253033_m1   | <a href="https://www.ncbi.nlm.nih.gov/nuccore/NM_001131020.1">https://www.ncbi.nlm.nih.gov/nuccore/NM_001131020.1</a> |
| <b>proteolipid protein 1 (plp1)</b>       | Mm01297210_m1   | <a href="https://www.ncbi.nlm.nih.gov/nuccore/NM_001290561.1">https://www.ncbi.nlm.nih.gov/nuccore/NM_001290561.1</a> |
| <b>Sox10</b>                              | Mm00569909_m1   | <a href="https://www.ncbi.nlm.nih.gov/nuccore/NM_011437.1">https://www.ncbi.nlm.nih.gov/nuccore/NM_011437.1</a>       |
| <b>ENTPD2</b>                             | Mm00515450_m1   | <a href="https://www.ncbi.nlm.nih.gov/nuccore/NM_009849.2">https://www.ncbi.nlm.nih.gov/nuccore/NM_009849.2</a>       |
| <b>s100beta</b>                           | Mm00485897_m1   | <a href="https://www.ncbi.nlm.nih.gov/nuccore/NM_009115.3">https://www.ncbi.nlm.nih.gov/nuccore/NM_009115.3</a>       |
| <b>GDNF</b>                               | Mm00599849_m1   | <a href="https://www.ncbi.nlm.nih.gov/nuccore/NM_001301332.1">https://www.ncbi.nlm.nih.gov/nuccore/NM_001301332.1</a> |

Suppl. Fig. 1

Tg(Ednrb-EGFP)EP59Gsat/Mmucd mice

(a)

(b)

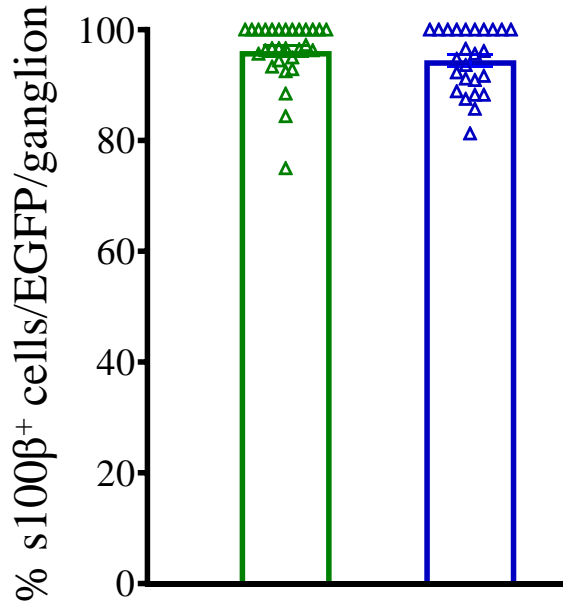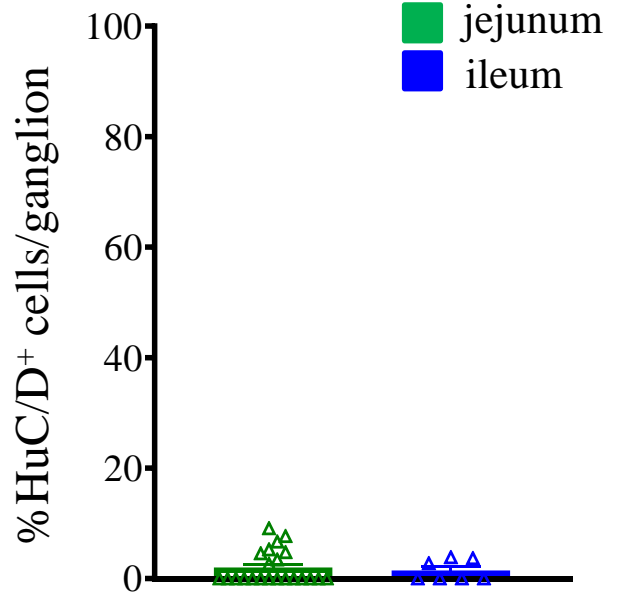

Suppl. Fig. 2

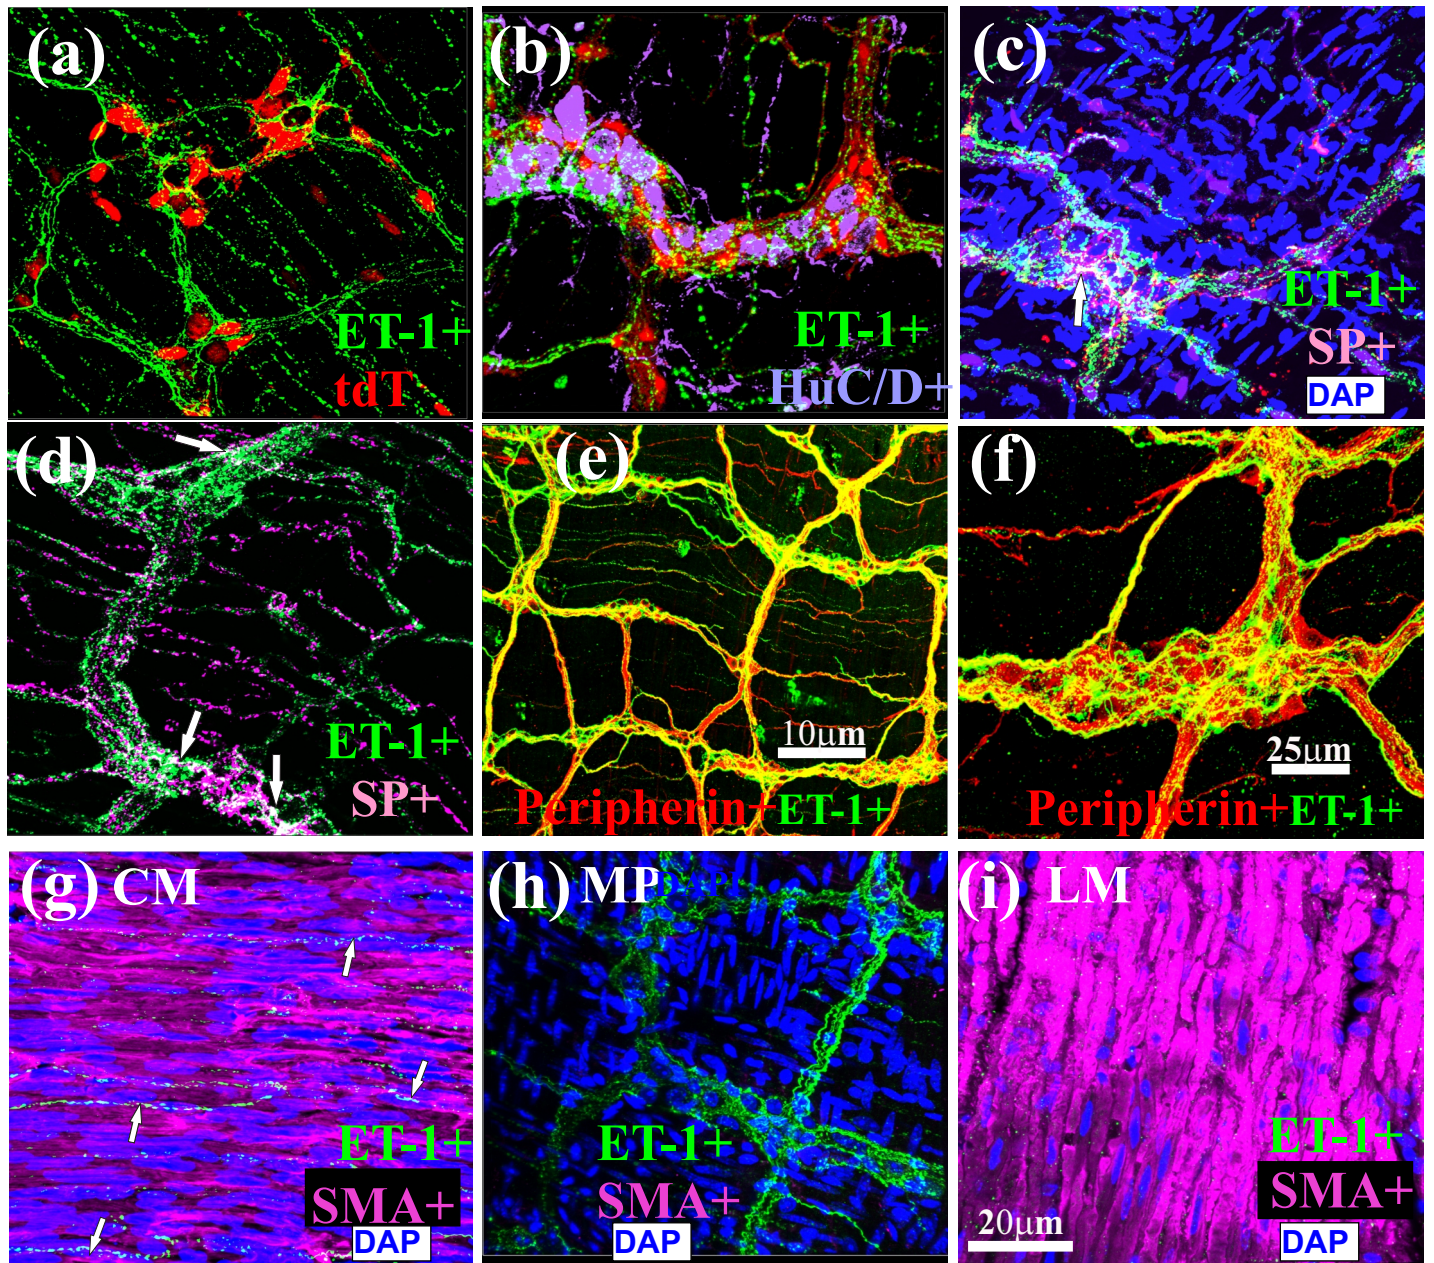

(j) RiboTag  
(ChAT-Neurons)

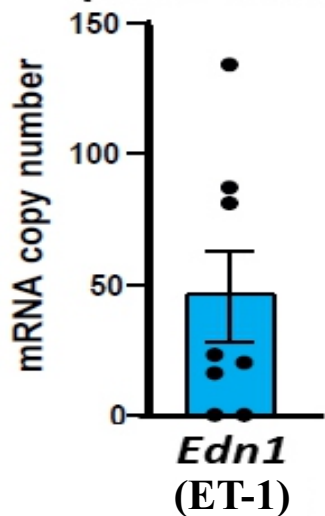

(k)

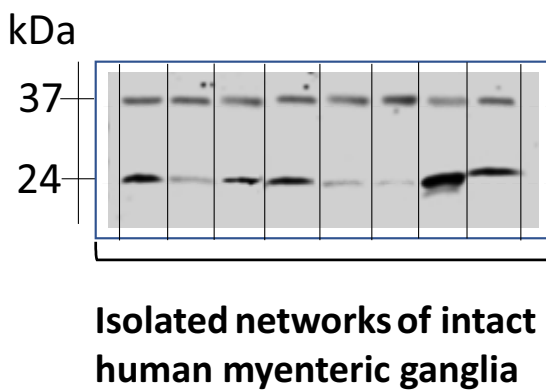

(l)

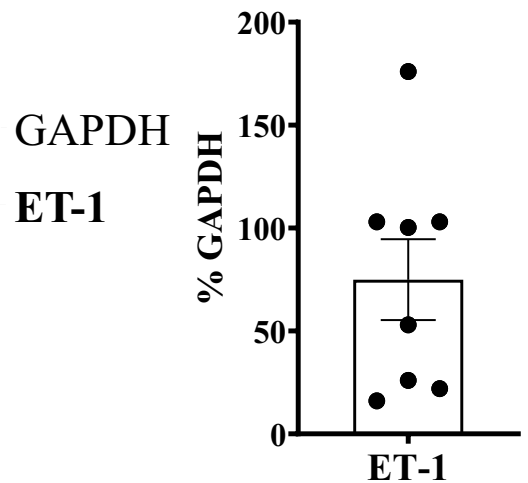

Suppl. Fig. 3 **Sox10<sup>CreERT2</sup>; GCaMP5g-tdT mice**

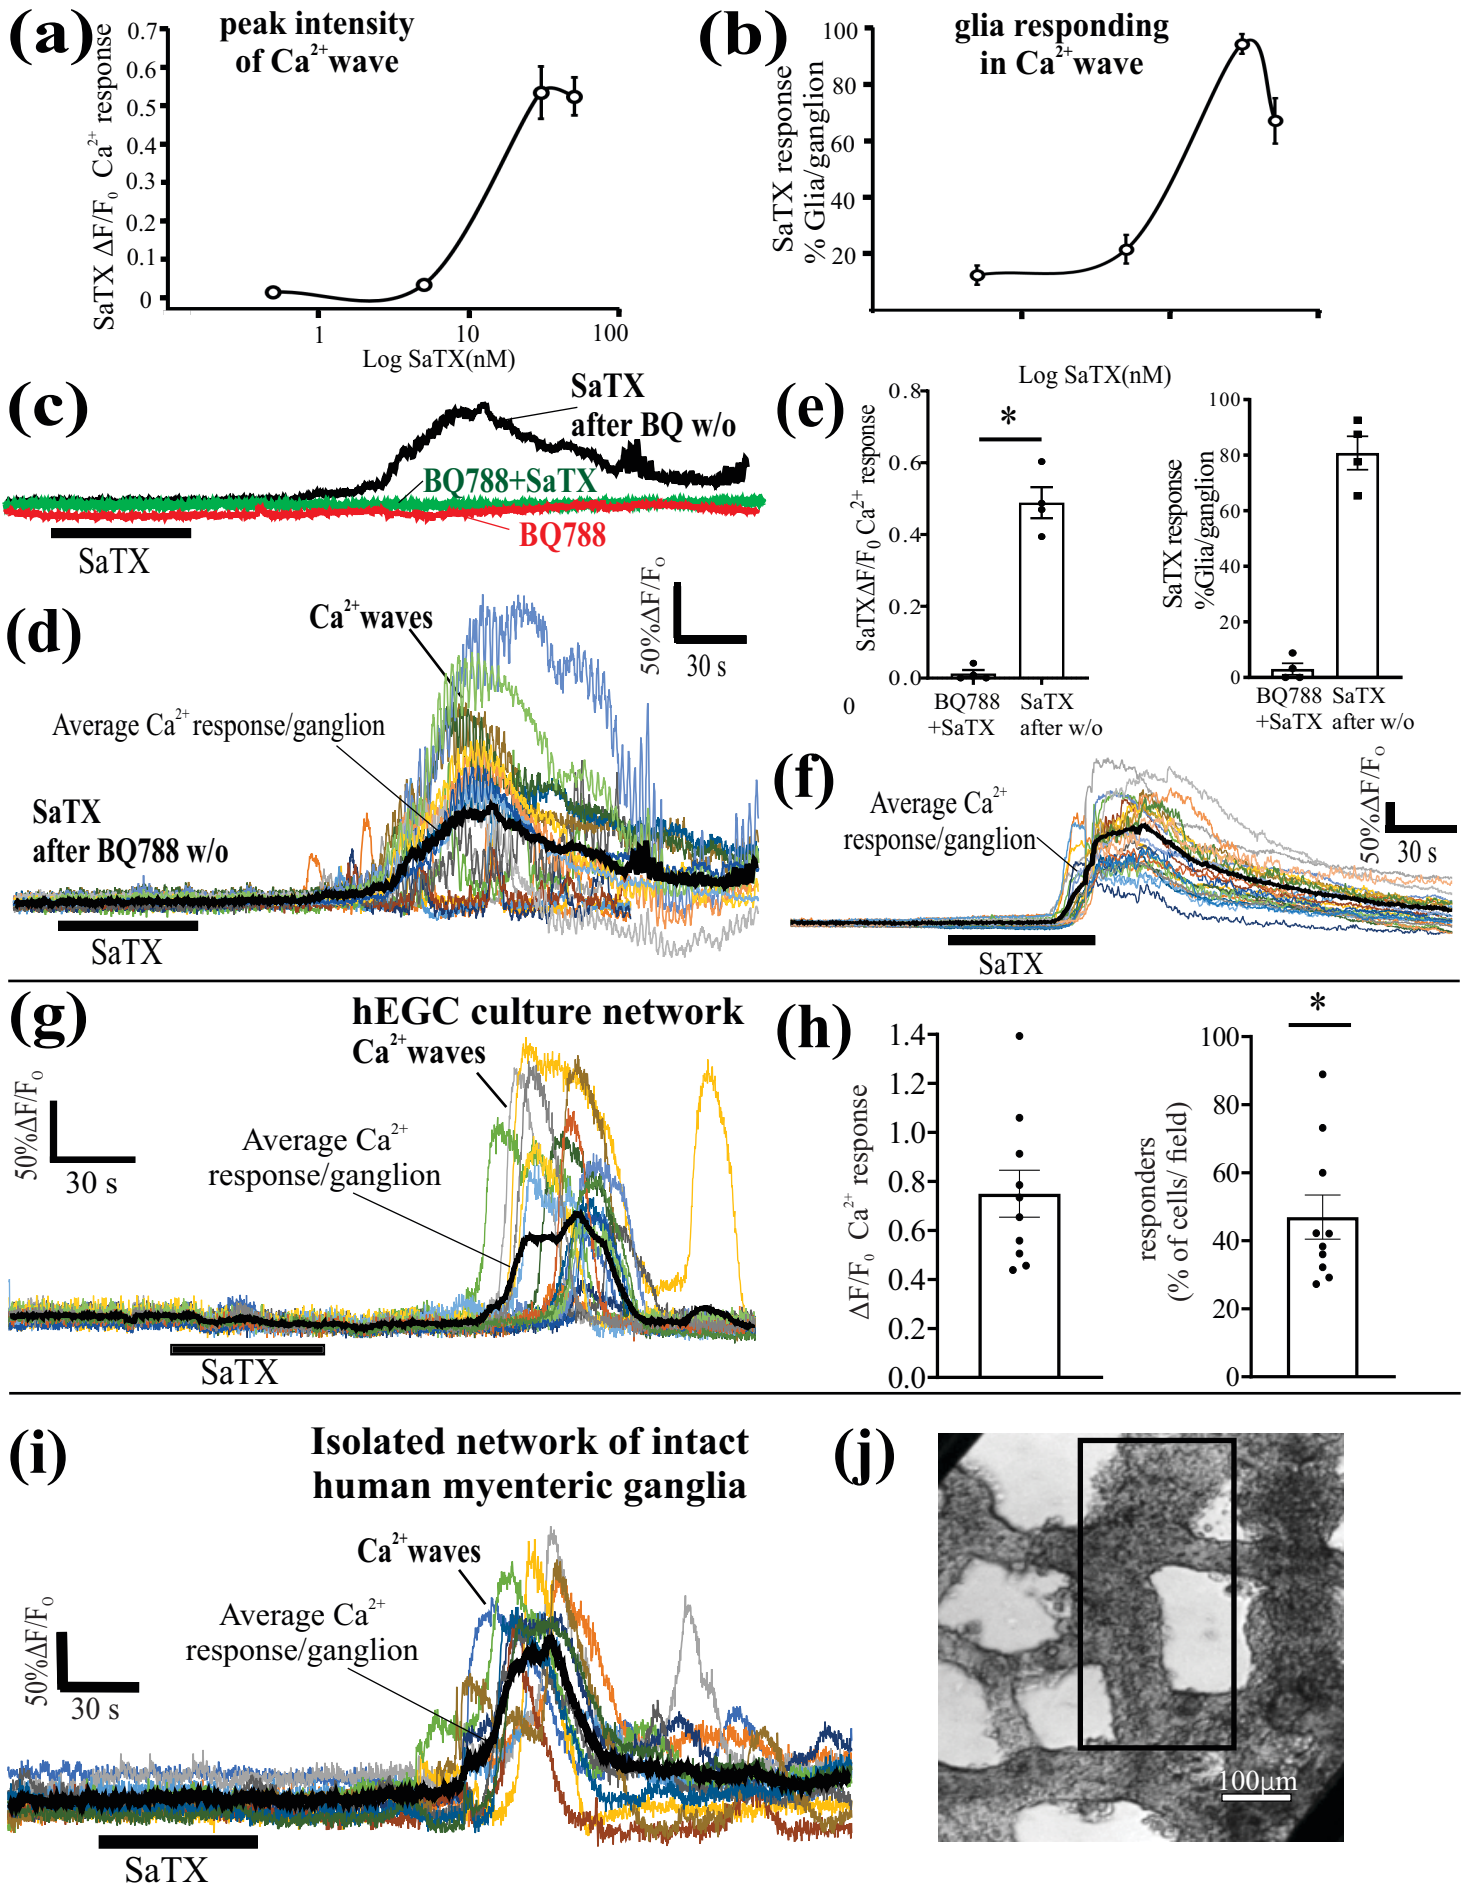

Suppl. Fig. 4

## CM Relaxation

**(a)** SaTX

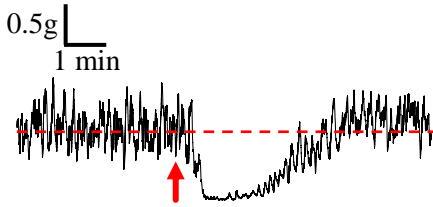

**(b)** SaTX

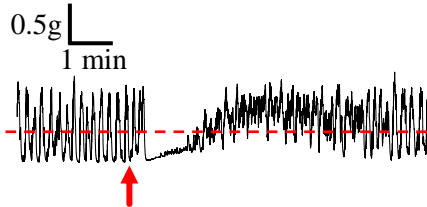

**(c)** SaTX

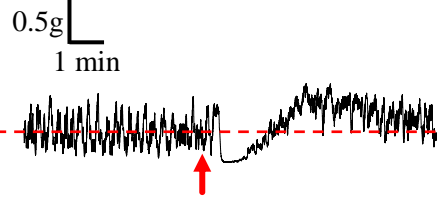

**(d)** SaTX

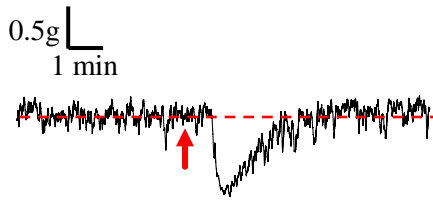

**(e)** BQ788 + SaTX

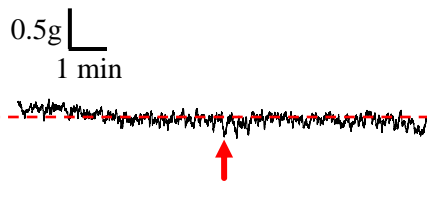

**(f)** SaTX + TTX

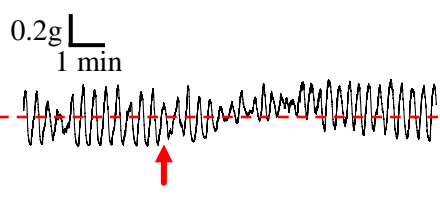

**(g)** ET-1

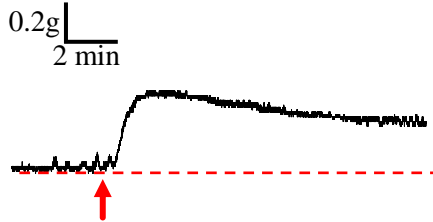

**(h)** ET-1

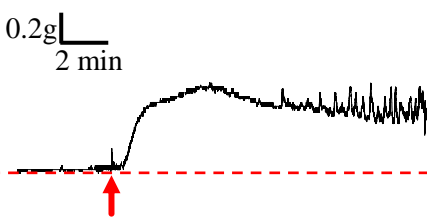

**(i)** TTX + ET-1

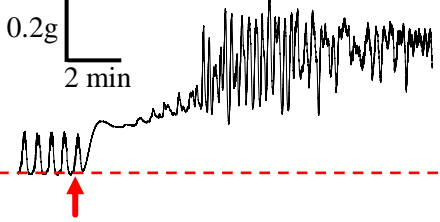

**(j)** BQ788

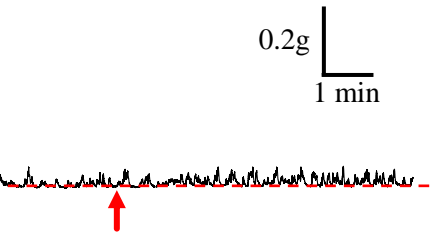

**(k)** BQ788 + ET1

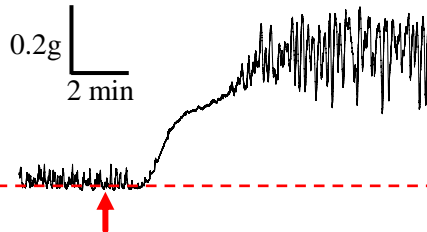

**(l)** ET-1

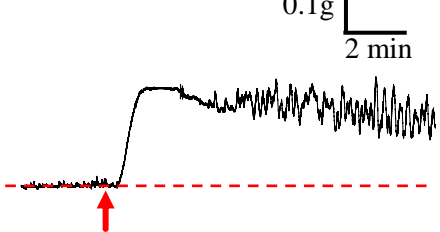

# Resting Tension

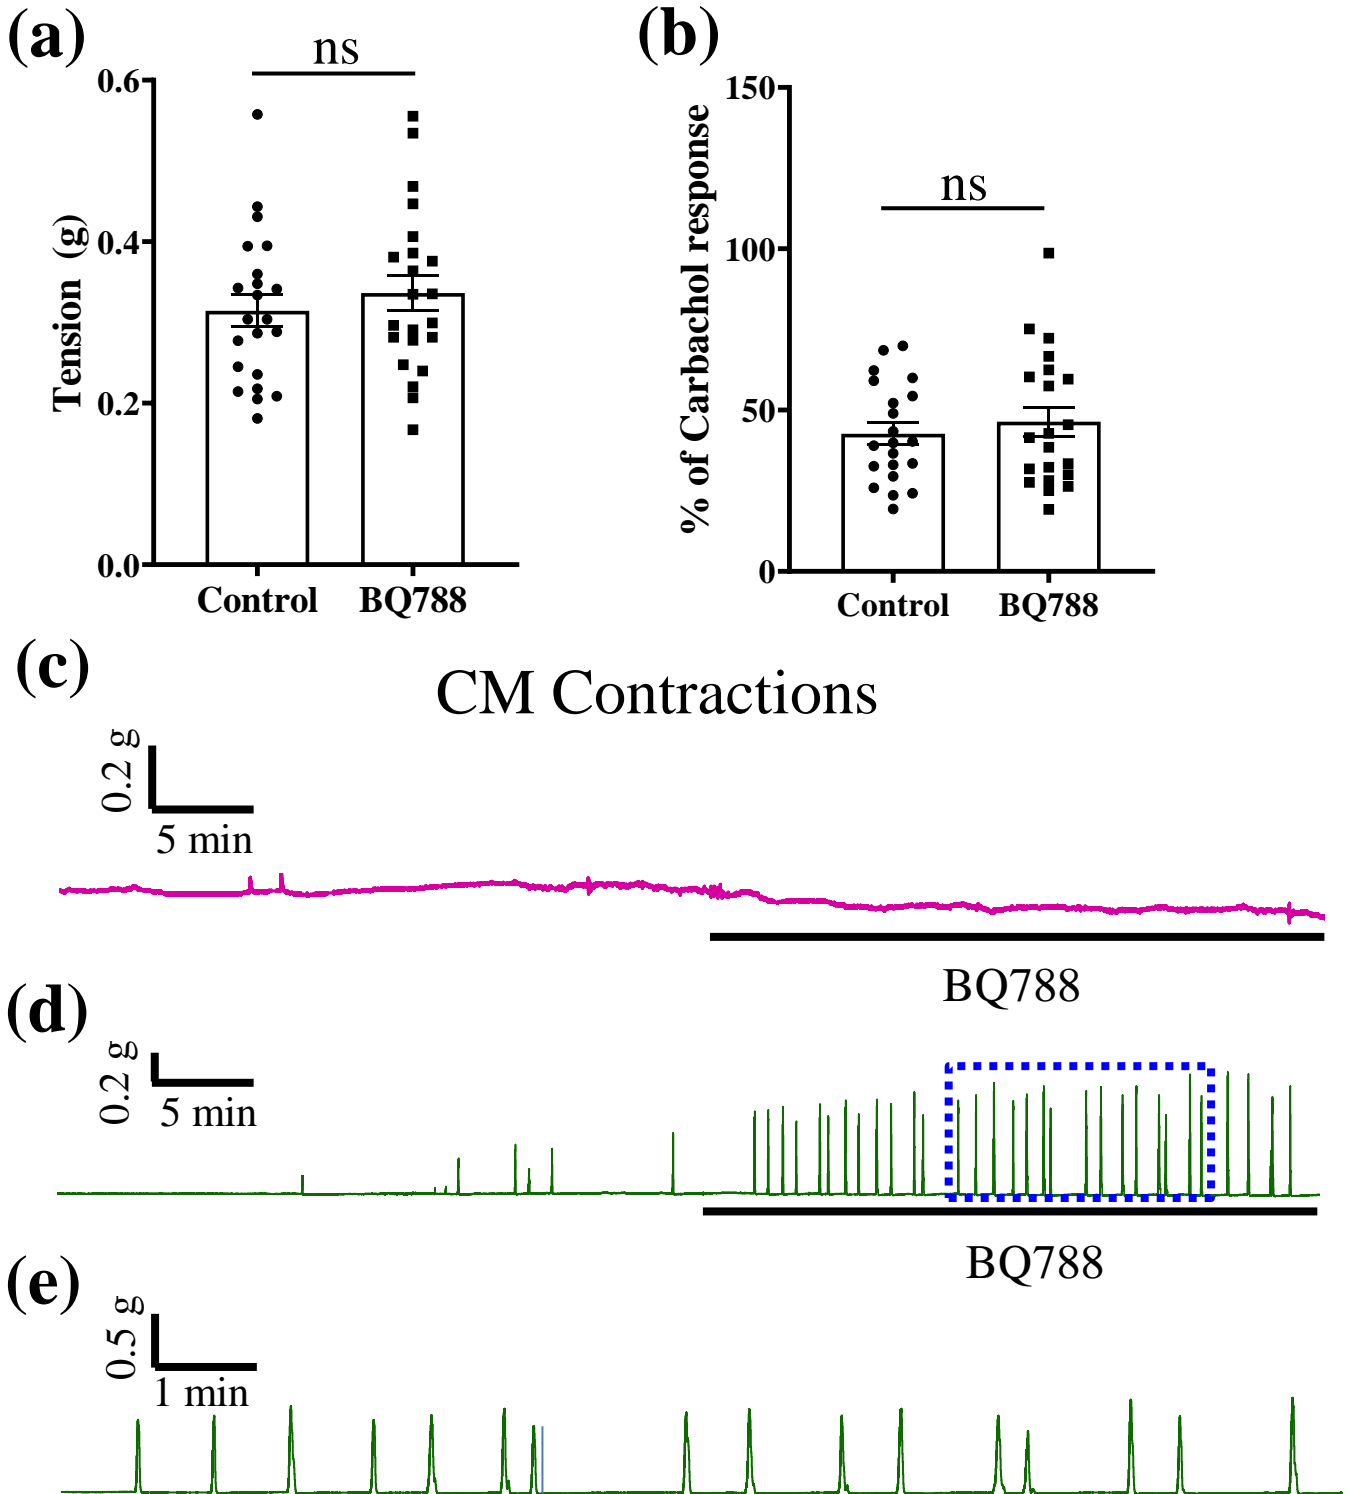

Suppl. Fig. 6

(a)

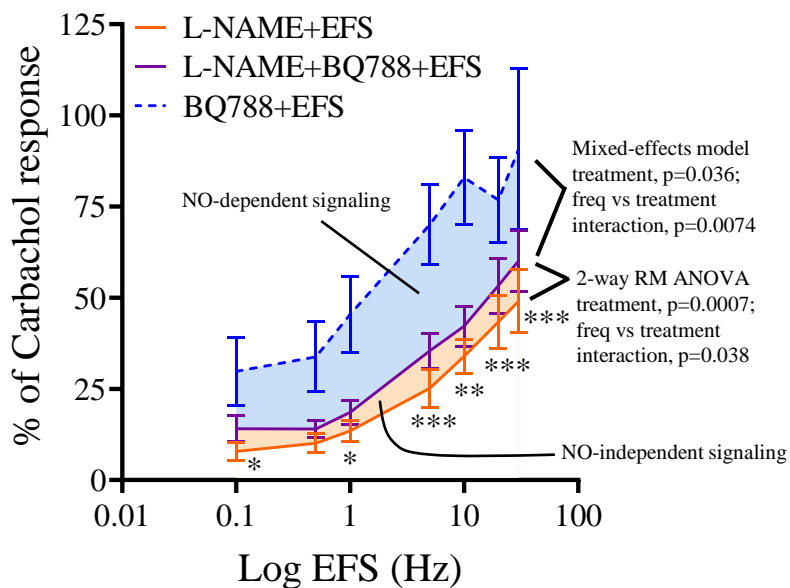

(b)

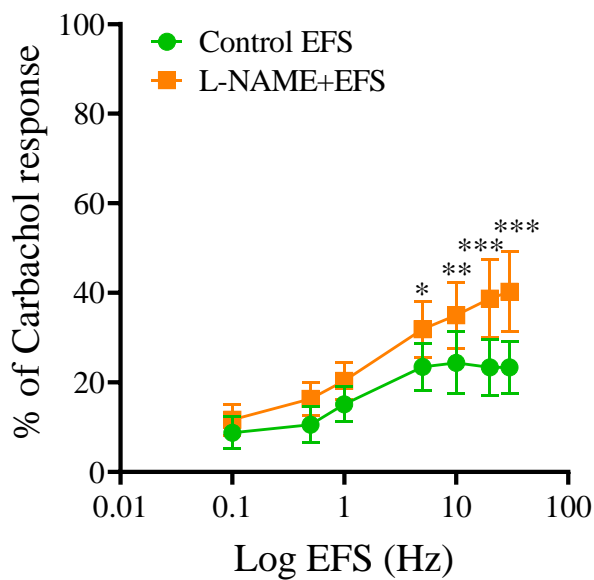



# Suppl. Fig. 7

## In Vivo effects of ETB<sub>R</sub> antagonism

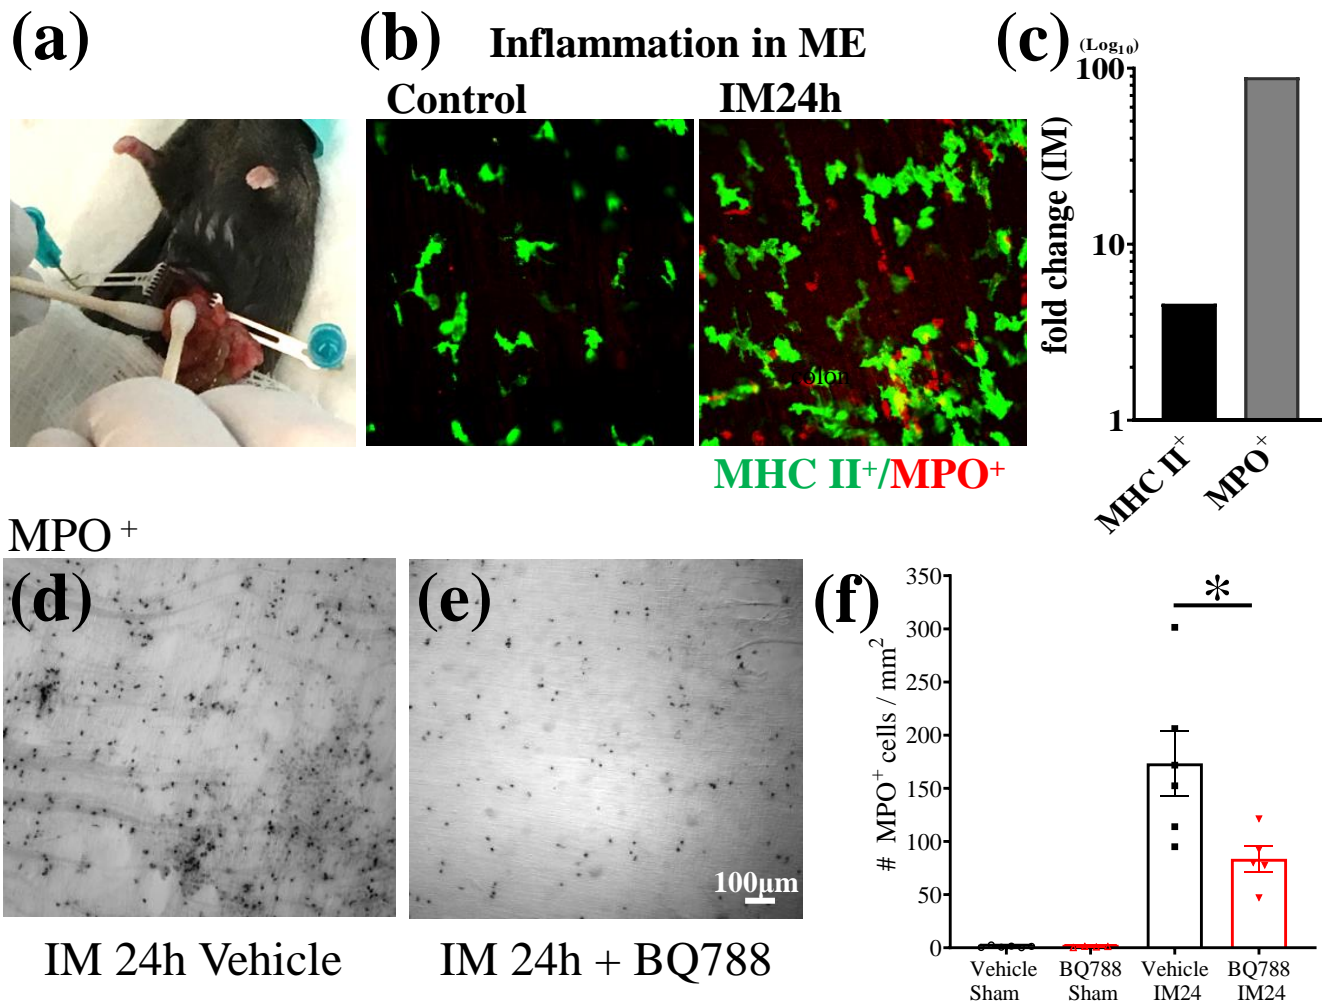

# Suppl. Fig. 8

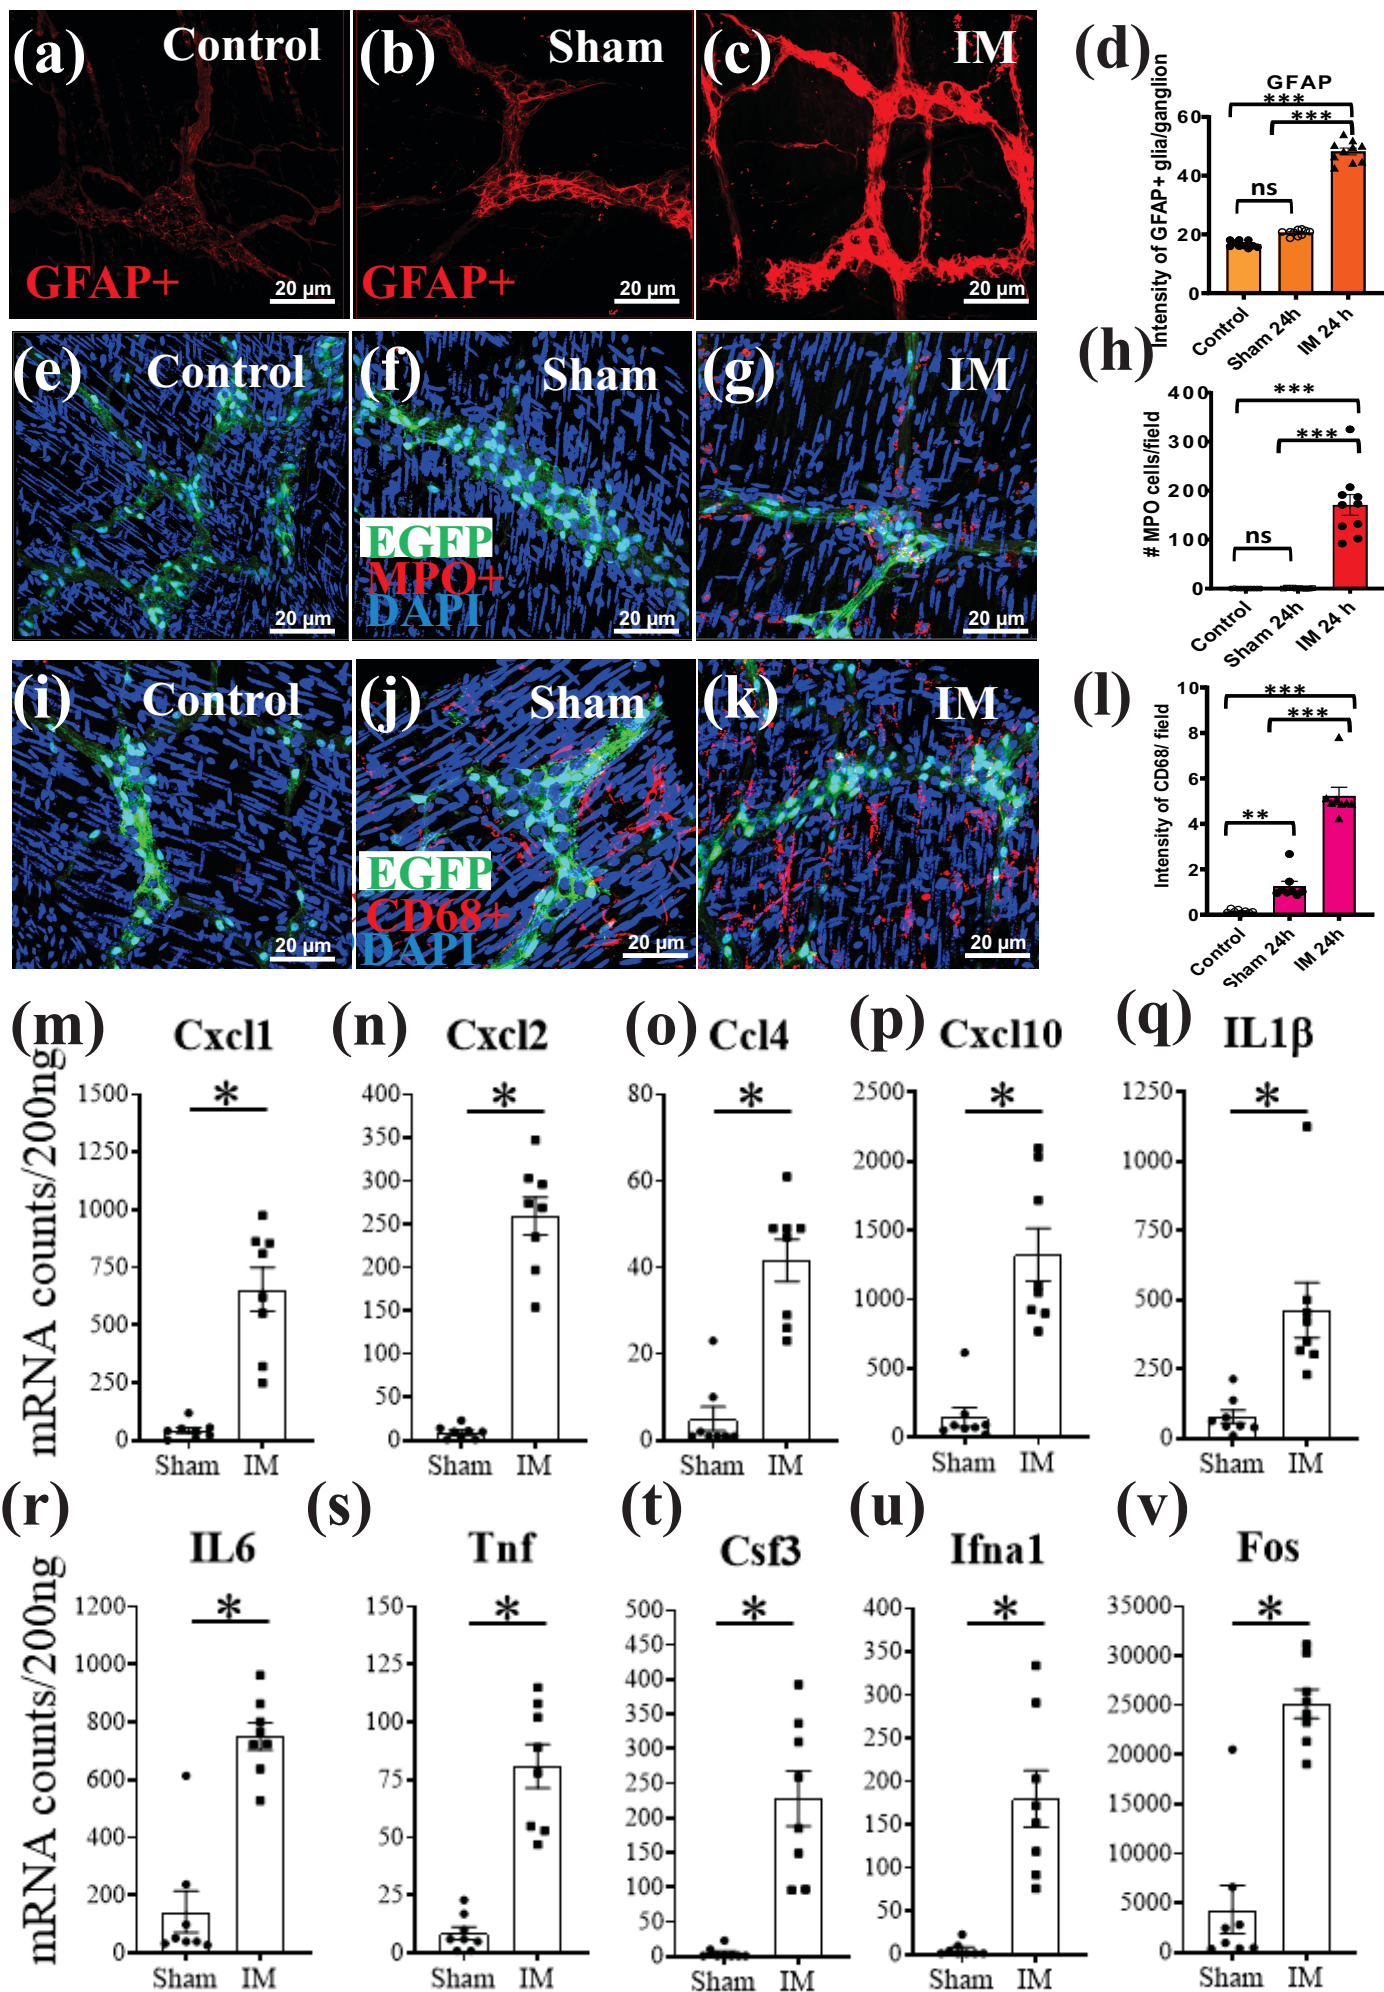

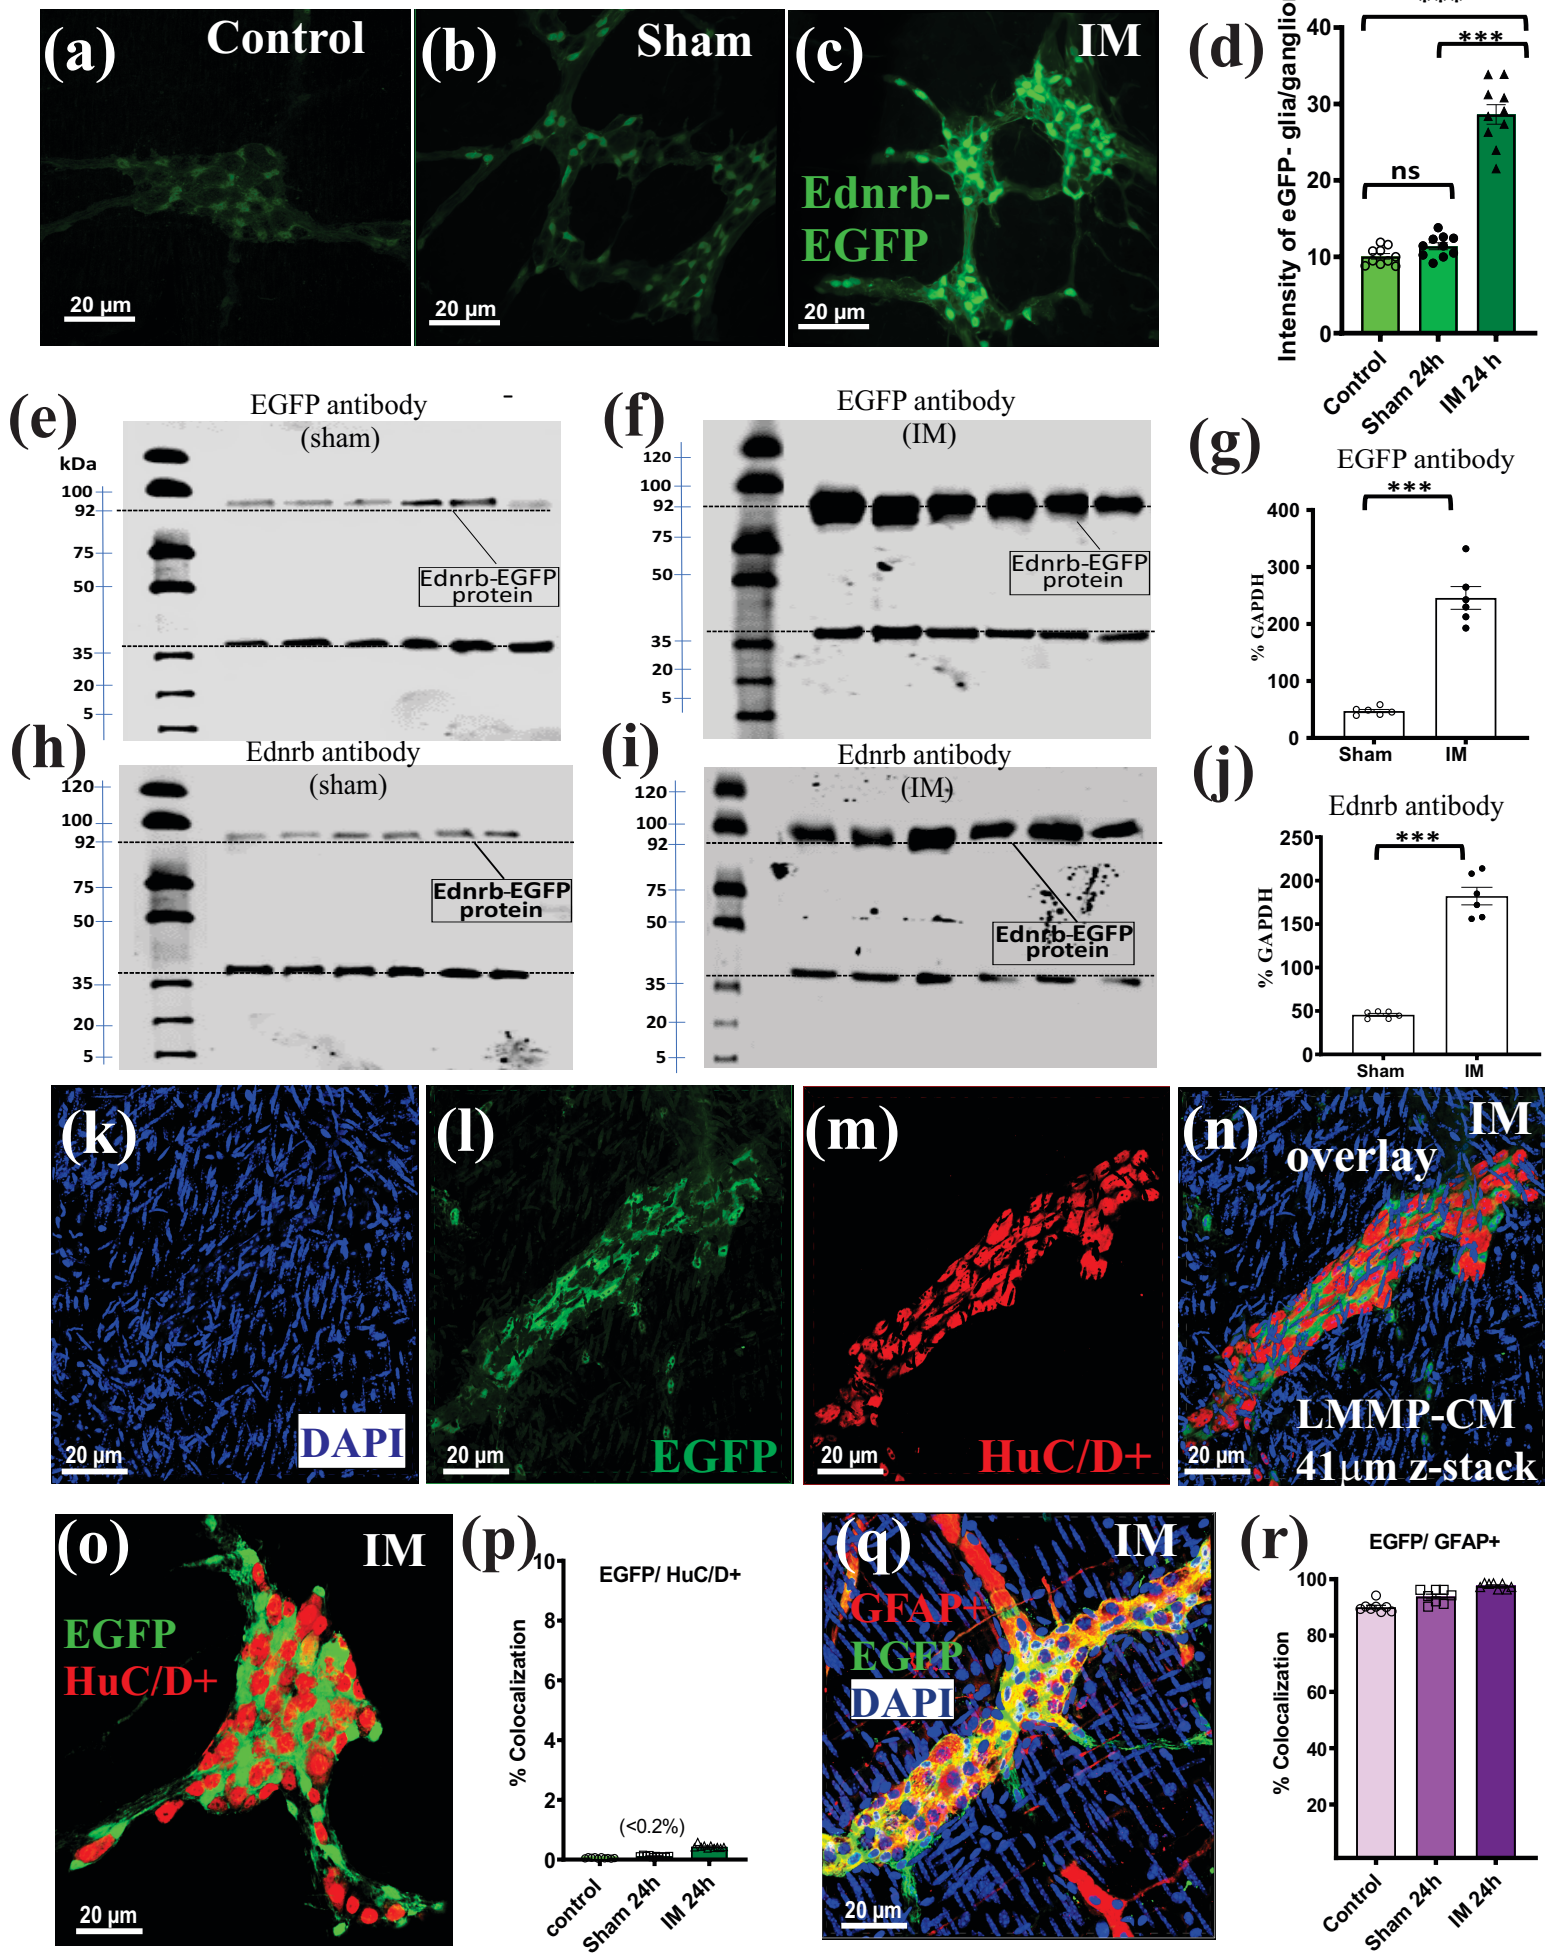

Supplement: NIHMS1926497-supplement-Supinfo1.pdf [file NIHMS1926497-supplement-Supinfo1.pdf]
