# Supplementary material
Source: PubMed Central journal article supplement (PMC11085045)

Suppl. Fig. 4

## CM Relaxation

**(a)** SaTX

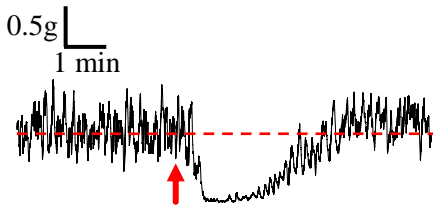

**(b)** SaTX

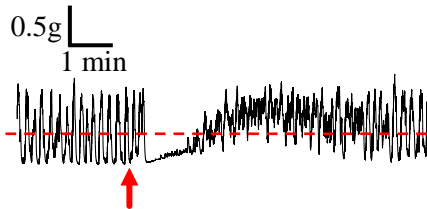

**(c)** SaTX

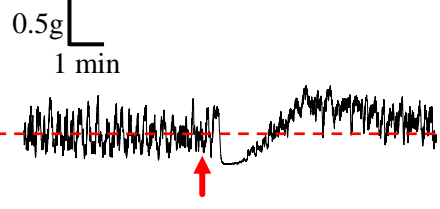

**(d)** SaTX

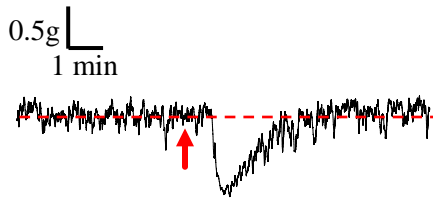

**(e)** BQ788 + SaTX

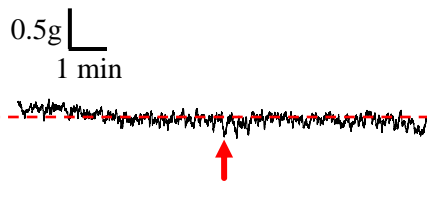

**(f)** SaTX + TTX

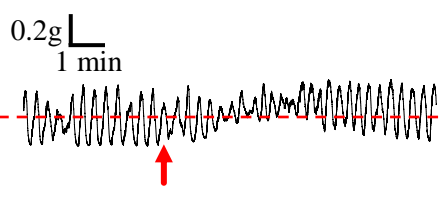

**(g)** ET-1

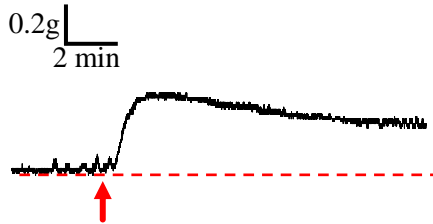

**(h)** ET-1

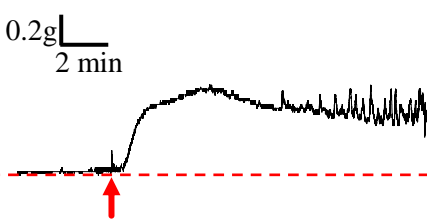

**(i)** TTX + ET-1

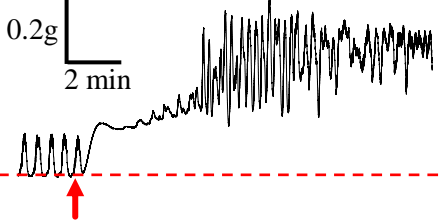

**(j)** BQ788

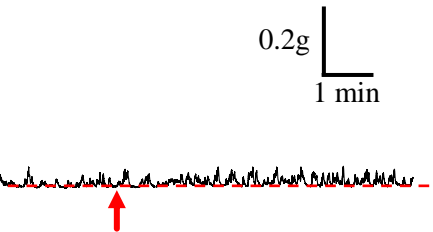

**(k)** BQ788 + ET1

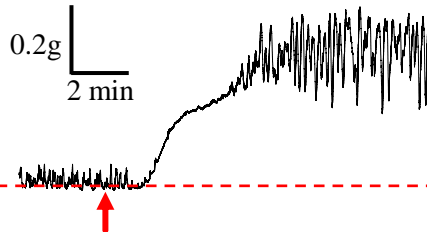

**(l)** ET-1

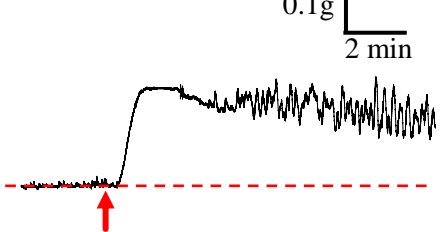

Supplement: NIHMS1926497-supplement-Fig_S4.pdf [file NIHMS1926497-supplement-Fig_S4.pdf]

# Resting Tension

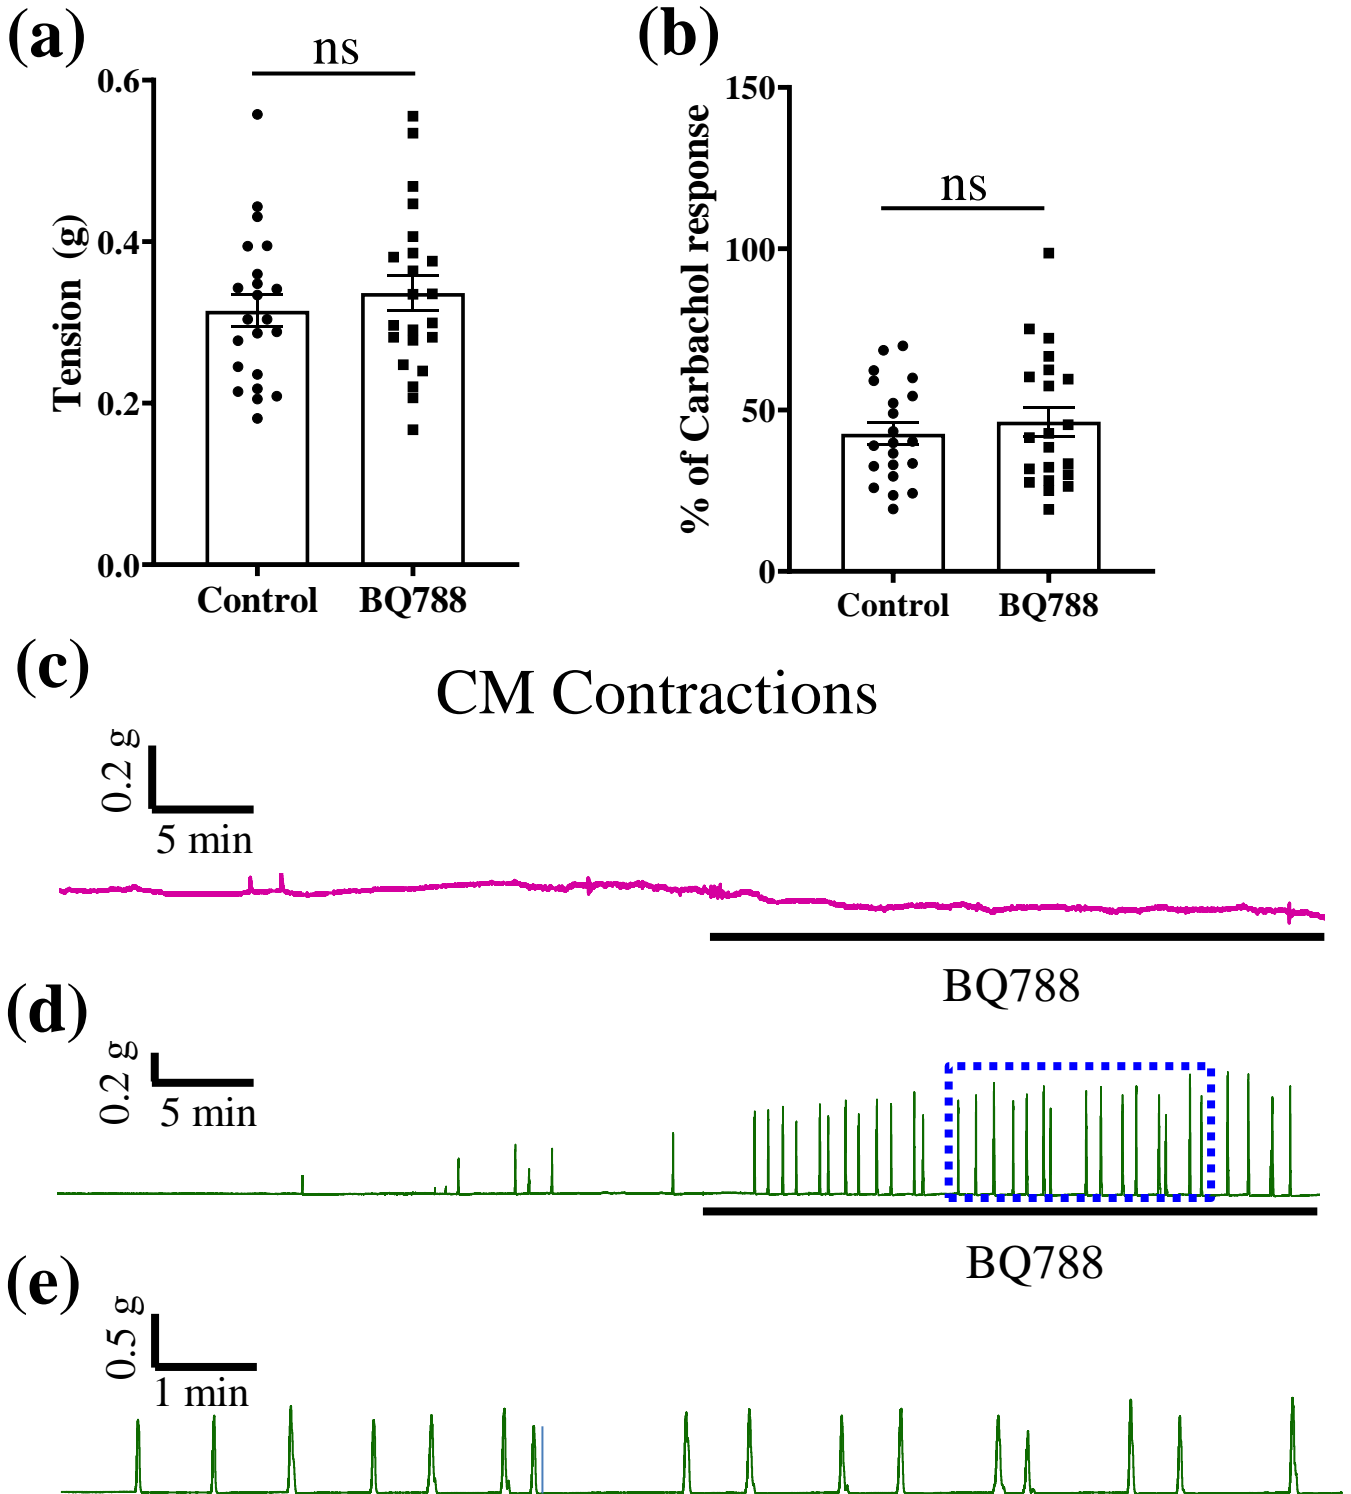

Supplement: NIHMS1926497-supplement-Fig_S5.pdf [file NIHMS1926497-supplement-Fig_S5.pdf]

Suppl. Fig. 6

(a)

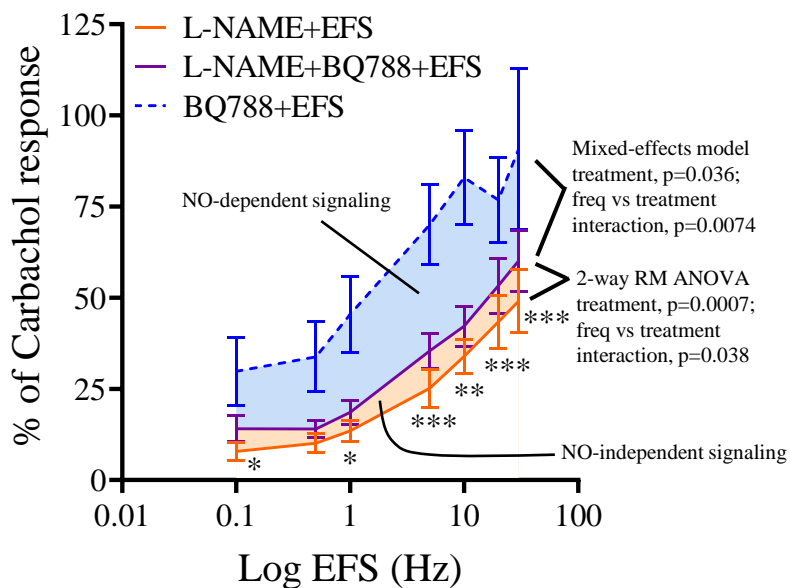

(b)

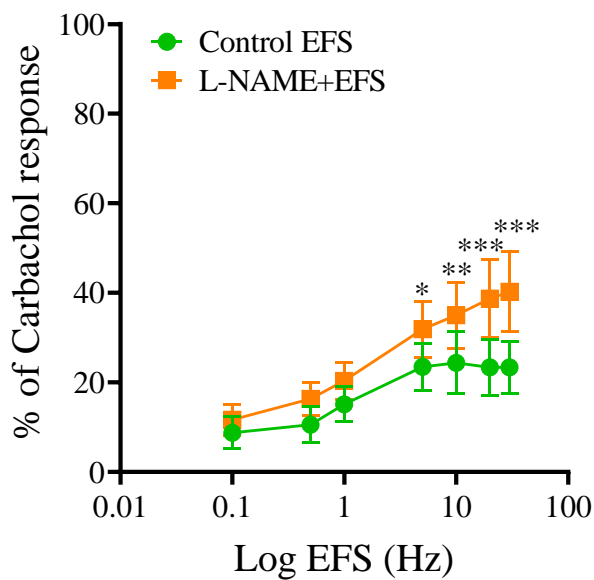

Supplement: NIHMS1926497-supplement-Fig_S6.pdf [file NIHMS1926497-supplement-Fig_S6.pdf]

# Suppl. Fig. 7

## In Vivo effects of ETB<sub>R</sub> antagonism

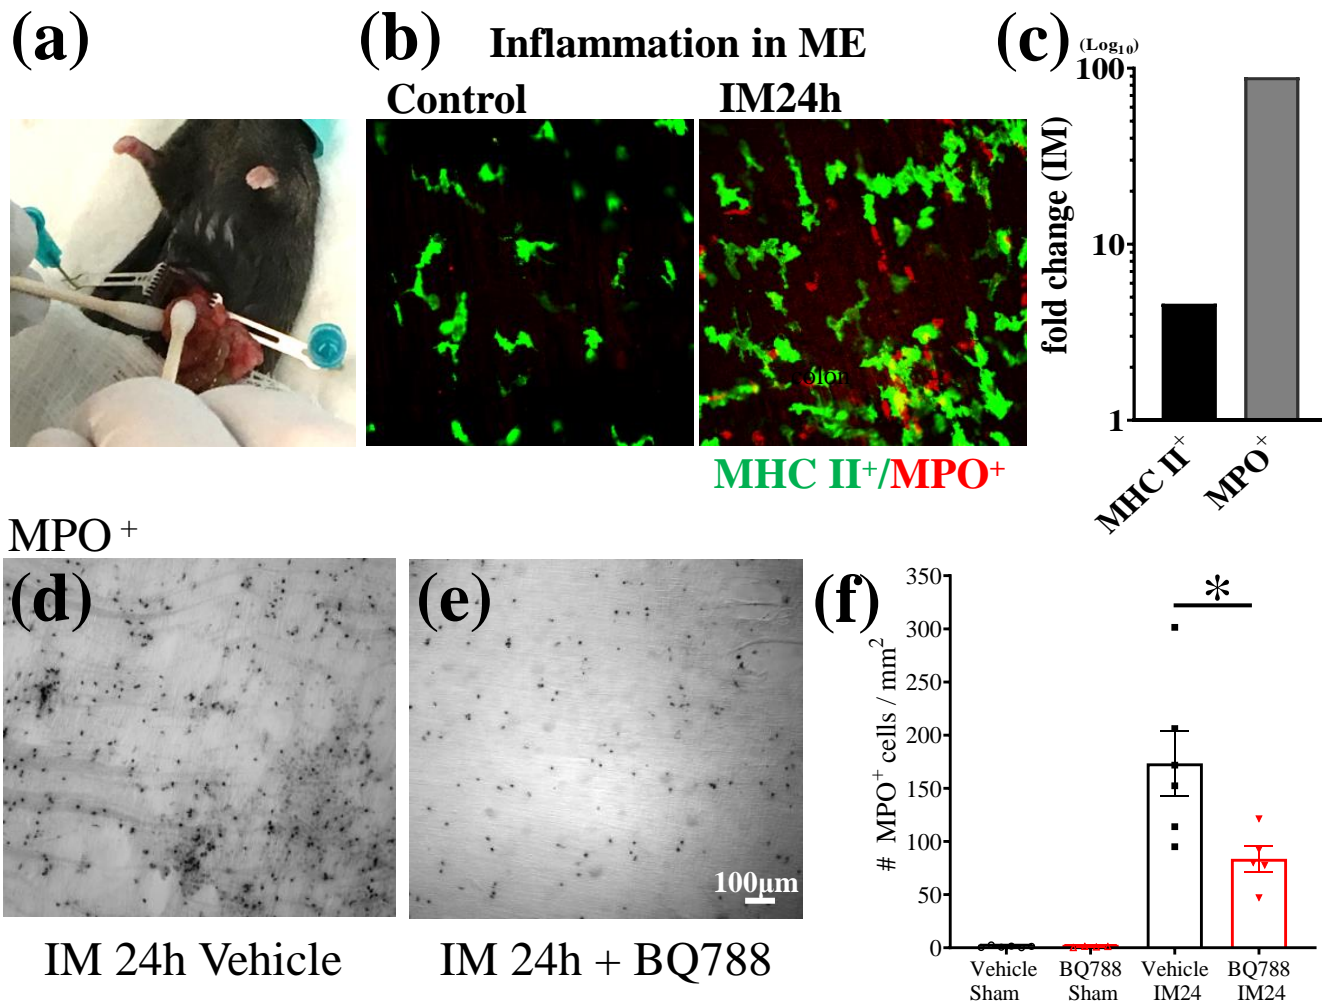

Supplement: NIHMS1926497-supplement-Fig_S7.pdf [file NIHMS1926497-supplement-Fig_S7.pdf]
